# Supplementary material
Source: ML conference proceedings conference paper supplement (https://openreview.net/forum?id=YmEDnMynuO)
Supplement: supplementary_material [file attachment]

---

# GraphAdapter: Tuning Vision-Language Models With Dual Knowledge Graph (Supplementary Materials)

---

Anonymous Author(s)

Affiliation

Address

email

1 Sec. 1 validates the applicability of our GraphAdapter by introducing it to the state-of-the-art adapter-  
2 style tuning methods, including CaFo [15] and TaskRes\* [14].

3 Sec. 2 provides more experimental details on Few-shot Learning for our GraphAdapter.

4 Sec. 3 describes more details about datasets and implementation.

5 Sec. 4 visualizes the textual graph nodes used for classification before and after utilizing our  
6 GraphAdapter.

7 Sec. 5 makes a comprehensive analysis of the possible broader impacts.

## 8 1 Applicability

9 To validate the applicability of our GraphAdapter, we select two state-of-the-art adapter-style works,  
10 including CaFo [15] and TaskRes\* [14]. Here, CaFo [15] incorporates diverse prior knowledge from  
11 large pre-trained vision and language models, including DINO’s vision-contrastive knowledge, GPT-  
12 3’s language-generative knowledge, and DALLE’s generative capability. The adapting strategy of  
13 CaFo [15] is from the Tip-Adapter [16]. The TaskRes\* denotes the enhanced version of TaskRes [14],  
14 which exploits the enhanced base classifier instead of the original classifier from CLIP [11].

15 For CaFo [15], we directly incorporate our GraphAdapter into the textual classifier. For TaskRes\* [14],  
16 we replace the task residual with our proposed GraphAdapter and maintain its enhanced textual  
17 branch from CLIP. The experimental results on ImageNet [3] are shown in Table 1. We can observe  
18 that our GraphAdapter can consistently increase the performance of CaFo [15] and TaskRes\* [14]  
19 on few-shot learning with all 1-/2-/4-/8-/16-shots settings. Particularly, on the 16-shot setting, ours  
20 improves CaFo [15] by 0.51%, and TaskRes\* by 1.15%, which validates the powerful applicability of  
21 our GraphAdapter. *Overall, our GraphAdapter is complementary to these prior-augmented methods,  
22 and can obtain better performance by integrating ours into them.*

Table 1: The experiments for the applicability of our GraphAdapter. For Cafo [15], we incorporate our GraphAdapter into the textual classifier. Notably, the TaskRes\* exploits the enhanced base classifier. Therefore, TaskRes\* + Ours denotes that TaskRes\* replace the task residual with our proposed GraphAdapter.

| Methods      | 1-shot       | 2-shot       | 4-shot       | 8-shot       | 16-shot      |
|--------------|--------------|--------------|--------------|--------------|--------------|
| CaFo [15]    | 63.80        | 64.34        | 65.64        | 66.86        | 68.79        |
| +Ours        | <b>63.81</b> | <b>64.97</b> | <b>66.17</b> | <b>67.68</b> | <b>69.30</b> |
| TaskRes*[14] | 61.43        | 62.17        | 62.93        | 64.03        | 64.75        |
| +Ours        | <b>61.73</b> | <b>62.53</b> | <b>63.47</b> | <b>64.57</b> | <b>65.80</b> |

## 23 2 More Experimental Results

24 We present the numerical results of “Figure 3 in the main text” as Table 2. We compare our  
 25 GraphAdapter with the state-of-the-art works, including the prompt-based method CoOp [17], and  
 26 adapter-style methods, *i.e.*, CLIP-Adapter [5], Tip-Adapter-F [16], and TaskRes [14]. Here, the  
 27 performance of Tip-Adapter-F is reproduced by [14], which aims to ensure a fair comparison with  
 28 CoOp [17]. From the table, we can find that on the 16-shot few-shot learning, our GraphAdapter  
 29 outperforms all previous works except for UCF101 [12] where its performance is comparable. Depart  
 30 from that, for the average accuracy of 11 benchmark datasets in the 1-/2-/4-/8-/16-shot few-shot  
 31 learning, our GraphAdapter surpasses previous works with a consistent improvement of 0.57% to  
 32 0.76%. We also make the analysis for the Error Bars by providing the standard deviation (Std) of our  
 33 experimental results in Table 2.

Table 2: A numerical comparison between our GraphAdapter and the state-of-the-art methods.

| Methods             | Setting | Caltech101              | DTD                     | EuroSAT                 | FGVCAircraft            | Flowers102              | Food101                 | ImageNet                | OxfordPets              | StanfordCars            | SUN397                  | UCF101                  | Avg.                    |
|---------------------|---------|-------------------------|-------------------------|-------------------------|-------------------------|-------------------------|-------------------------|-------------------------|-------------------------|-------------------------|-------------------------|-------------------------|-------------------------|
| Zero-shot CLIP [11] | 1-shot  | 86.29                   | 42.32                   | 37.56                   | 17.28                   | 66.14                   | 77.31                   | 58.18                   | 85.77                   | 55.61                   | 58.52                   | 61.46                   | 58.77                   |
| CoOp [17]           |         | 87.53                   | 44.39                   | 50.63                   | 9.64                    | 68.12                   | 74.32                   | 57.15                   | 85.89                   | 55.59                   | 60.29                   | 61.92                   | 59.59                   |
| CLIP-Adapter [5]    |         | 88.60                   | 45.80                   | 61.40                   | 17.49                   | 73.49                   | <b>76.82</b>            | 61.20                   | 85.99                   | 55.13                   | 61.30                   | 62.20                   | 62.67                   |
| Tip-Adapter-F [16]  |         | 88.80                   | 50.49                   | 50.34                   | 19.01                   | <b>81.17</b>            | 76.22                   | 60.88                   | <b>86.04</b>            | 56.78                   | 61.23                   | <b>66.19</b>            | 63.38                   |
| TaskRes [14]        |         | 88.80                   | 50.17                   | 61.27                   | <b>21.20</b>            | 78.77                   | 74.03                   | 61.43                   | 83.50                   | 58.77                   | <b>61.93</b>            | 64.57                   | 64.04                   |
| Ours (w/ Std)       |         | <b>88.90</b><br>(±0.22) | <b>51.77</b><br>(±1.48) | <b>63.30</b><br>(±1.96) | 20.93<br>(±0.25)        | 79.98<br>(±0.90)        | 75.43<br>(±0.14)        | <b>61.50</b><br>(±0.09) | 84.40<br>(±1.02)        | <b>59.70</b><br>(±0.45) | <b>61.93</b><br>(±0.26) | 64.93<br>(±0.59)        | <b>64.80</b><br>(±0.34) |
| Zero-shot CLIP [11] | 2-shot  | 86.29                   | 42.32                   | 37.56                   | 17.28                   | 66.14                   | <b>77.31</b>            | 58.18                   | 85.77                   | 55.61                   | 58.52                   | 61.46                   | 58.77                   |
| CoOp [17]           |         | 87.93                   | 45.15                   | 61.50                   | 18.68                   | 77.51                   | 72.49                   | 57.81                   | 82.64                   | 58.28                   | 59.48                   | 64.09                   | 62.32                   |
| CLIP-Adapter [5]    |         | 89.37                   | 51.48                   | 63.90                   | 20.10                   | 81.61                   | 77.22                   | 61.52                   | <b>86.73</b>            | 58.74                   | 63.29                   | 67.12                   | 65.55                   |
| Tip-Adapter-F [16]  |         | 89.61                   | 55.32                   | 64.76                   | 21.76                   | 85.40                   | 77.05                   | 61.57                   | 86.06                   | 61.13                   | 63.19                   | 68.99                   | 66.80                   |
| TaskRes [14]        |         | 90.13                   | 54.53                   | 65.77                   | 23.07                   | <b>85.63</b>            | 75.30                   | 62.17                   | 84.43                   | 62.77                   | 64.33                   | 69.10                   | 67.02                   |
| Ours (w/ Std)       |         | <b>90.20</b><br>(±0.22) | <b>55.75</b><br>(±1.56) | <b>67.27</b><br>(±1.57) | <b>23.80</b><br>(±0.65) | <b>85.63</b><br>(±0.25) | 76.27<br>(±0.12)        | <b>62.32</b><br>(±0.17) | 86.30<br>(±0.99)        | <b>63.23</b><br>(±0.12) | <b>64.60</b><br>(±0.33) | <b>69.47</b><br>(±0.42) | <b>67.71</b><br>(±0.31) |
| Zero-shot CLIP [11] | 4-shot  | 86.29                   | 42.32                   | 37.56                   | 17.28                   | 66.14                   | 77.31                   | 58.18                   | 85.77                   | 55.61                   | 58.52                   | 61.46                   | 58.77                   |
| CoOp [17]           |         | 89.55                   | 53.49                   | 70.18                   | 21.87                   | 86.20                   | 73.33                   | 59.99                   | 86.70                   | 62.62                   | 63.47                   | 67.03                   | 66.77                   |
| CLIP-Adapter [5]    |         | 89.98                   | 56.86                   | 73.38                   | 22.59                   | 87.17                   | <b>77.92</b>            | 61.84                   | <b>87.46</b>            | 62.45                   | 65.96                   | 69.05                   | 68.61                   |
| Tip-Adapter-F [16]  |         | 90.87                   | <b>60.25</b>            | 69.66                   | 26.39                   | 89.53                   | 77.46                   | 62.62                   | 86.46                   | 64.86                   | 65.88                   | <b>72.71</b>            | 69.70                   |
| TaskRes [14]        |         | 90.63                   | 59.50                   | 72.97                   | 24.83                   | 89.50                   | 76.23                   | 62.93                   | 86.27                   | 66.50                   | 66.67                   | 69.70                   | 69.61                   |
| Ours (w/ Std)       |         | <b>90.97</b><br>(±0.05) | 59.63<br>(±0.39)        | <b>75.20</b><br>(±1.37) | <b>26.97</b><br>(±0.29) | <b>89.90</b><br>(±0.19) | 76.77<br>(±0.26)        | <b>63.12</b><br>(±0.19) | 86.57<br>(±1.47)        | <b>66.53</b><br>(±0.29) | <b>66.70</b><br>(±0.28) | 71.47<br>(±0.16)        | <b>70.35</b><br>(±0.27) |
| Zero-shot CLIP [11] | 8-shot  | 86.29                   | 42.32                   | 37.56                   | 17.28                   | 66.14                   | 77.31                   | 58.18                   | 85.77                   | 55.61                   | 58.52                   | 61.46                   | 58.77                   |
| CoOp [17]           |         | 90.21                   | 59.97                   | 76.73                   | 26.13                   | 91.18                   | 71.82                   | 61.56                   | 85.32                   | 68.43                   | 65.52                   | 71.94                   | 69.89                   |
| CLIP-Adapter [5]    |         | 91.40                   | 61.00                   | 77.93                   | 26.25                   | 91.72                   | <b>78.04</b>            | 62.68                   | 87.65                   | 67.89                   | 67.50                   | 73.30                   | 71.40                   |
| Tip-Adapter-F [16]  |         | 91.70                   | 62.93                   | 79.33                   | 30.62                   | 91.00                   | 77.90                   | 64.15                   | <b>88.28</b>            | 69.51                   | <b>69.23</b>            | 74.76                   | 72.67                   |
| TaskRes [14]        |         | 92.23                   | 64.23                   | 78.07                   | 29.50                   | <b>94.30</b>            | 76.90                   | 64.03                   | 87.07                   | <b>70.57</b>            | 68.70                   | 74.77                   | 72.76                   |
| Ours (w/ Std)       |         | <b>92.45</b><br>(±0.38) | <b>64.50</b><br>(±0.34) | <b>80.17</b><br>(±1.87) | <b>31.37</b><br>(±0.40) | 94.07<br>(±0.12)        | 77.73<br>(±0.19)        | <b>64.23</b><br>(±0.08) | 87.63<br>(±0.26)        | 70.53<br>(±0.12)        | 68.97<br>(±0.12)        | <b>75.73</b><br>(±0.45) | <b>73.40</b><br>(±0.29) |
| Zero-shot CLIP [11] | 16-shot | 86.29                   | 42.32                   | 37.56                   | 17.28                   | 66.14                   | 77.31                   | 58.18                   | 85.77                   | 55.61                   | 58.52                   | 61.46                   | 58.77                   |
| CoOp [17]           |         | 91.83                   | 63.58                   | 83.53                   | 31.26                   | 94.51                   | 74.67                   | 62.95                   | 87.01                   | 73.36                   | 69.26                   | 75.71                   | 73.42                   |
| CLIP-Adapter [5]    |         | 92.49                   | 65.96                   | 84.43                   | 32.10                   | 93.90                   | 78.25                   | 63.59                   | 87.84                   | 74.01                   | 69.55                   | 76.76                   | 74.44                   |
| Tip-Adapter-F [16]  |         | 92.63                   | 66.94                   | 84.94                   | 35.86                   | 94.23                   | 78.11                   | 65.44                   | 88.18                   | 75.75                   | 71.00                   | <b>79.03</b>            | 75.65                   |
| TaskRes [14]        |         | 92.90                   | <b>67.57</b>            | 82.57                   | 33.73                   | 96.10                   | 78.23                   | 64.75                   | 88.10                   | 74.93                   | 70.30                   | 76.87                   | 75.10                   |
| Ours (w/ Std)       |         | <b>93.33</b><br>(±0.08) | <b>67.57</b><br>(±0.09) | <b>85.27</b><br>(±0.29) | <b>36.87</b><br>(±0.50) | <b>96.23</b><br>(±0.16) | <b>78.63</b><br>(±0.08) | <b>65.70</b><br>(±0.08) | <b>88.57</b><br>(±0.51) | <b>76.23</b><br>(±0.17) | <b>71.20</b><br>(±0.08) | 78.80<br>(±0.26)        | <b>76.22</b><br>(±0.11) |

## 34 3 More Dataset and Implementation Details

35 **More Dataset Details.** In this paper, we follow previous works, *e.g.*, CoOp [17], CLIP-Adapter [5],  
 36 TaskRes [14], and Tip-Adapter [16], and exploit the prompts in Table 3 for the tuning and testing.

37 **More Implementation Details.** Our experimental results are achieved by running the algorithm  
 38 three times with different seeds for each setting. The training and inference are implemented with a  
 39 single NVIDIA GeForce RTX 3090. In the implementation of GraphAdapter for the ImageNet [3],  
 40 we decouple the sub-graph with 1000 nodes for each modality into four graphs with 256 nodes to  
 41 alleviate the computational cost.

## 42 4 Visualization of Graph Nodes

43 To demonstrate how our GraphAdapter works for the adapter-style tuning for VLMs, we visualize  
 44 the graph nodes for textual features before and after the GraphAdapter. As shown in Figure 1, we

Table 3: The number of classes and the used prompt templet for each dataset.

| Datasets         | # Classes | Prompt Templet                                                                                                                                                                                                                                  |
|------------------|-----------|-------------------------------------------------------------------------------------------------------------------------------------------------------------------------------------------------------------------------------------------------|
| Caltech101 [4]   | 100       | “a photo of a [class].”                                                                                                                                                                                                                         |
| DTD [2]          | 47        | “[class] texture.”                                                                                                                                                                                                                              |
| EuroSAT [6]      | 10        | “a centered satellite photo of [class].”                                                                                                                                                                                                        |
| FGVCAircraft [8] | 100       | “a photo of a [class], a type of aircraft.”                                                                                                                                                                                                     |
| Flowers102 [9]   | 102       | “a photo of a [class], a type of flower.”                                                                                                                                                                                                       |
| Food101 [1]      | 101       | “a photo of a [class], a type of food.”                                                                                                                                                                                                         |
| OxfordPets [10]  | 37        | “a photo of a [class], a type of pet.”                                                                                                                                                                                                          |
| StanfordCars [7] | 196       | “a photo of a [class].”                                                                                                                                                                                                                         |
| SUN397 [13]      | 397       | “a photo of a [class].”                                                                                                                                                                                                                         |
| UCF101 [12]      | 101       | “a photo of a person doing [class].”                                                                                                                                                                                                            |
| ImageNet [3]     | 1000      | Ensemble of 7 selected templates, including “itap of a [class].”, “a bad photo of the [class].”, “a origami [class].”, “a photo of the large [class].”, “a [class] in a video game.”, “art of the [class].” and “a photo of the small [class].” |

45 randomly sampled 20 classes from ImageNet [3] and utilize the t-SNE to visualize the distribution  
 46 of each node corresponding to the textual fracture for classification. We can observe that with our  
 47 GraphAdapter, the nodes of different classes move in directions that lead to much larger inter-class  
 48 distances, thereby improving the performance of adapter-style tuning for VLMs.

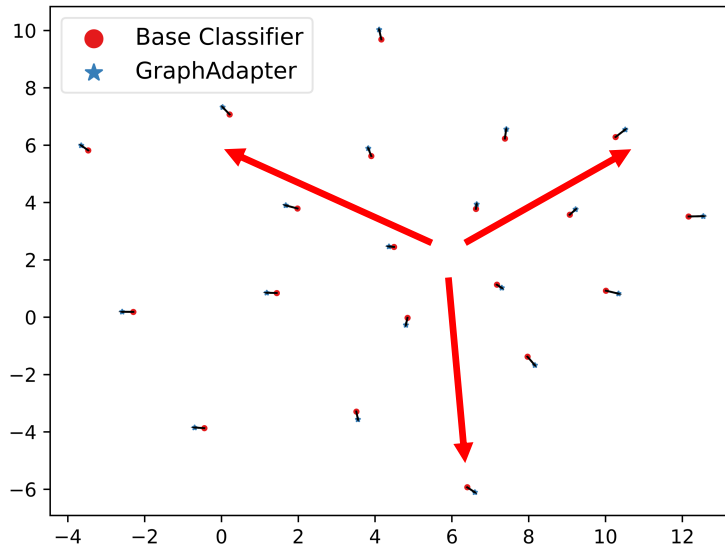

Figure 1: Visualization of the variance of the graph nodes before and after GraphAdapter. Each node represents the representation of one class. We randomly sampled 20 classes from ImageNet for better visualization. The nodes move toward the direction that leads to much larger inter-class distances after GraphAdapter. The red arrows denote the directions.

## 49 5 Broader Impacts

50 The adapter-style tuning of VLMs aims to efficiently finetune the VLMs for downstream tasks by  
 51 optimizing a few parameters in the low-data regime. The possible broader impact of our GraphAdapter  
 52 stems from the tuning of VLMs itself, which has a heavy dependency on the pre-trained VLMs. The  
 53 utilization of our GraphAdapter should follow the privacy and safety of datasets and pre-trained  
 54 models.

## 55 References

- 56 [1] L. Bossard, M. Guillaumin, and L. Van Gool. Food-101—mining discriminative components  
57 with random forests. In *Computer Vision—ECCV 2014: 13th European Conference, Zurich,*  
58 *Switzerland, September 6–12, 2014, Proceedings, Part VI 13*, pages 446–461. Springer, 2014.
- 59 [2] M. Cimpoi, S. Maji, I. Kokkinos, S. Mohamed, and A. Vedaldi. Describing textures in the  
60 wild. In *Proceedings of the IEEE conference on computer vision and pattern recognition*, pages  
61 3606–3613, 2014.
- 62 [3] J. Deng, W. Dong, R. Socher, L.-J. Li, K. Li, and L. Fei-Fei. Imagenet: A large-scale hierarchical  
63 image database. In *2009 IEEE conference on computer vision and pattern recognition*, pages  
64 248–255. Ieee, 2009.
- 65 [4] L. Fei-Fei, R. Fergus, and P. Perona. Learning generative visual models from few training ex-  
66 amples: An incremental bayesian approach tested on 101 object categories. In *2004 conference*  
67 *on computer vision and pattern recognition workshop*, pages 178–178. IEEE, 2004.
- 68 [5] P. Gao, S. Geng, R. Zhang, T. Ma, R. Fang, Y. Zhang, H. Li, and Y. Qiao. Clip-adapter: Better  
69 vision-language models with feature adapters. *arXiv preprint arXiv:2110.04544*, 2021.
- 70 [6] P. Helber, B. Bischke, A. Dengel, and D. Borth. Eurosat: A novel dataset and deep learning  
71 benchmark for land use and land cover classification. *IEEE Journal of Selected Topics in*  
72 *Applied Earth Observations and Remote Sensing*, 12(7):2217–2226, 2019.
- 73 [7] J. Krause, M. Stark, J. Deng, and L. Fei-Fei. 3d object representations for fine-grained  
74 categorization. In *Proceedings of the IEEE international conference on computer vision*  
75 *workshops*, pages 554–561, 2013.
- 76 [8] S. Maji, E. Rahtu, J. Kannala, M. Blaschko, and A. Vedaldi. Fine-grained visual classification  
77 of aircraft. *arXiv preprint arXiv:1306.5151*, 2013.
- 78 [9] M.-E. Nilsback and A. Zisserman. Automated flower classification over a large number of  
79 classes. In *2008 Sixth Indian Conference on Computer Vision, Graphics & Image Processing*,  
80 pages 722–729. IEEE, 2008.
- 81 [10] O. M. Parkhi, A. Vedaldi, A. Zisserman, and C. Jawahar. Cats and dogs. In *2012 IEEE*  
82 *conference on computer vision and pattern recognition*, pages 3498–3505. IEEE, 2012.
- 83 [11] A. Radford, J. W. Kim, C. Hallacy, A. Ramesh, G. Goh, S. Agarwal, G. Sastry, A. Askell,  
84 P. Mishkin, J. Clark, et al. Learning transferable visual models from natural language supervision.  
85 In *International conference on machine learning*, pages 8748–8763. PMLR, 2021.
- 86 [12] K. Soomro, A. R. Zamir, and M. Shah. Ucf101: A dataset of 101 human actions classes from  
87 videos in the wild. *arXiv preprint arXiv:1212.0402*, 2012.
- 88 [13] J. Xiao, J. Hays, K. A. Ehinger, A. Oliva, and A. Torralba. Sun database: Large-scale scene  
89 recognition from abbey to zoo. In *2010 IEEE computer society conference on computer vision*  
90 *and pattern recognition*, pages 3485–3492. IEEE, 2010.
- 91 [14] T. Yu, Z. Lu, X. Jin, Z. Chen, and X. Wang. Task residual for tuning vision-language models.  
92 *arXiv preprint arXiv:2211.10277*, 2022.
- 93 [15] R. Zhang, X. Hu, B. Li, S. Huang, H. Deng, H. Li, Y. Qiao, and P. Gao. Prompt, generate,  
94 then cache: Cascade of foundation models makes strong few-shot learners. *arXiv preprint*  
95 *arXiv:2303.02151*, 2023.
- 96 [16] R. Zhang, W. Zhang, R. Fang, P. Gao, K. Li, J. Dai, Y. Qiao, and H. Li. Tip-adapter: Training-  
97 free adaption of clip for few-shot classification. In *Computer Vision—ECCV 2022: 17th European*  
98 *Conference, Tel Aviv, Israel, October 23–27, 2022, Proceedings, Part XXXV*, pages 493–510.  
99 Springer, 2022.
- 100 [17] K. Zhou, J. Yang, C. C. Loy, and Z. Liu. Learning to prompt for vision-language models.  
101 *International Journal of Computer Vision*, 130(9):2337–2348, 2022.
